# Supplementary material for: Multi-cell ECM compaction is predictable via superposition of nonlinear cell dynamics linearized in augmented state space
Source: PubMed Central journal article supplement (PMC6774565; doi:10.1371/journal.pcbi.1006798), 2019-09-20

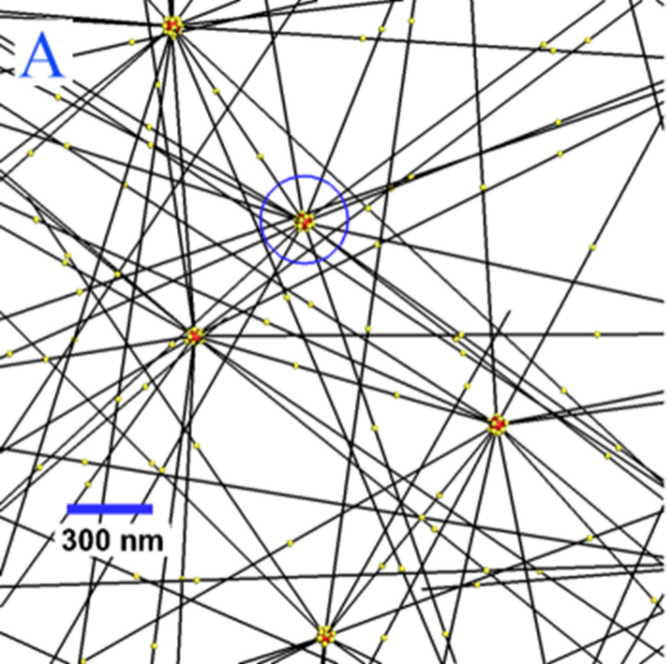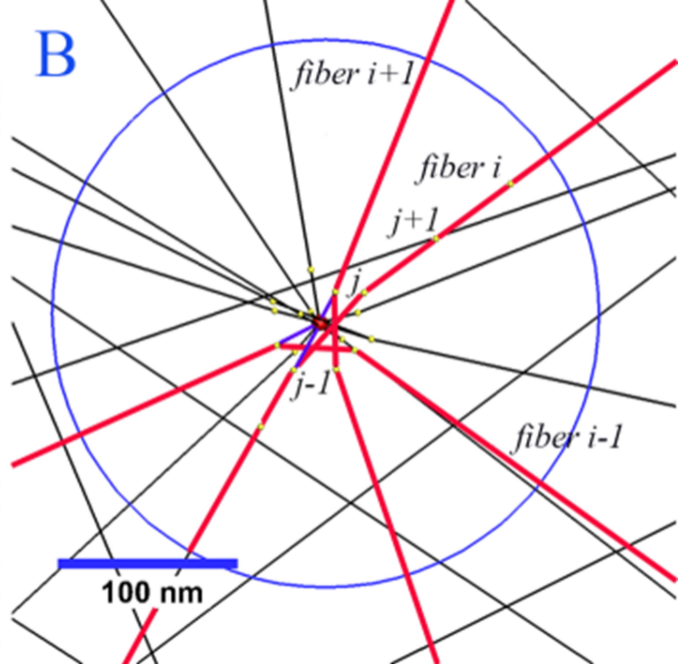

Supplement: pcbi.1006798.s002.pdf [file pcbi.1006798.s002.pdf]
