# Supplementary material for: Multi-cell ECM compaction is predictable via superposition of nonlinear cell dynamics linearized in augmented state space
Source: PubMed Central journal article supplement (PMC6774565; doi:10.1371/journal.pcbi.1006798), 2019-09-20
Supplement: pcbi.1006798.s008.pdf [file pcbi.1006798.s008.pdf]

**Table S1. List of simulation parameters.**

| Parameter                  | Definition                                                                                          | Value                              | Sources |
|----------------------------|-----------------------------------------------------------------------------------------------------|------------------------------------|---------|
| $A$                        | Area [ $\mu m^2$ ]                                                                                  |                                    |         |
| $A_f$                      | Averaged cross-sectional area of a single fiber [ $\mu m^2$ ]                                       | $(1.32) \times 10^{-3}$            |         |
| $A_i^c$                    | Area of the $i$ - $th$ surface of the cell membrane [ $\mu m^2$ ]                                   |                                    |         |
| $A_i^t$                    | Area of the $i$ - $th$ surface of the transduce layer [ $\mu m^2$ ]                                 |                                    |         |
| $A_i^n$                    | Area of the $i$ - $th$ surface of the nuclear membrane [ $\mu m^2$ ]                                |                                    |         |
| $D_c$                      | Friction coefficients associated with the energy dissipation at the integrin node [ $Nsm^{-1}$ ]    | 0.001                              | C       |
| $D_{cort}$                 | Drag coefficients associated with viscoelastic behaviors in actin cortex                            | 0.006                              | C       |
| $D_e$                      | Friction coefficients associated with the energy dissipation at the ECM fiber node [ $Nsm^{-1}$ ]   | 0.001                              | C       |
| $D_t$                      | Friction coefficients associated with the energy dissipation at the transduce node [ $Nsm^{-1}$ ]   | 0.001                              | C       |
| $d_{SF,i}$                 | Distance between the $i$ - $th$ node of transduce layer and the $j$ - $th$ node of nuclear membrane |                                    |         |
| $F$                        | Force [N]                                                                                           |                                    |         |
| $E_f^e$                    | Young's modulus value of single fiber [Mpa]                                                         | 1                                  | C       |
| $E_{SF}$                   | Young's modulus value of SFs [kPa]                                                                  | 230                                | (14)    |
| $H$                        | Energy                                                                                              | 300                                | C       |
| $h_c$                      | Critical height [nm]                                                                                | 300                                | C       |
| $h_p$                      | Height from the surface of ECN fiber to the $i$ - $th$ node of cellular membrane [nm]               |                                    |         |
| $L$                        | Length                                                                                              |                                    |         |
| $L_i^c$                    | Length of the $i$ - $th$ line on the surface of the cell membrane [ $\mu m$ ]                       | 0.001                              | C       |
| $L_i^t$                    | Length of the $i$ - $th$ line on the surface of the transduce layer [ $\mu m$ ]                     |                                    |         |
| $L_i^n$                    | Length of the $i$ - $th$ line on the surface of the nuclear membrane [ $\mu m$ ]                    | 0.001                              | C       |
| $L_b$                      | Stretched length of bonds between receptors and ligands                                             |                                    |         |
| $L_{SF,i}^1$               | Length of the $i$ - $th$ single unit of SFs at the present time [nm]                                |                                    |         |
| $L_{SF,i}^0$               | Length of the $i$ - $th$ single unit of SFs at the previous time [nm]                               |                                    |         |
| $L_{ij}^e$                 | Stressed length of the $j$ - $th$ segment of the $i$ - $th$ fiber [ $\mu m$ ]                       |                                    |         |
| $L_{ij}^e0$                | Unstressed length of the $j$ - $th$ segment of the $i$ - $th$ fiber [ $\mu m$ ]                     |                                    |         |
| $N_e$                      | Number of nodes at ECM fiber networks                                                               | 30k ~ 234k                         |         |
| $N_c$                      | Number of nodes at cellular membrane                                                                | 98                                 |         |
| $N_t$                      | Number of nodes at transduce layer                                                                  | 98                                 |         |
| $N_n$                      | Number of nodes at nuclear membrane                                                                 | 98                                 |         |
| $N_{SF}$                   | Number of contractile compartments in the $i$ - $th$ SF                                             |                                    |         |
| $N_i^e$                    | Number of nodes at the $i$ - $th$ fiber                                                             |                                    |         |
| $n_{b,i}$                  | Number of bonds at between receptors on the $i$ - $th$ node of cellular membrane and ligands        |                                    |         |
| $n_{tot}$                  | Total number of integrin molecules at each node of cellular membrane                                | 100                                | C       |
| $\hat{\mathbf{n}}_{R,i}^c$ | A unit vector at the local surface of the $i$ - $th$ node of cellular membrane                      |                                    |         |
| $\hat{\mathbf{n}}_w$       | A unit normal vector orthogonal to the ECM fiber                                                    |                                    |         |
| $\kappa_A^c$               | Effective spring constant of area elements of the cell membrane [N/m]                               | $1.0 \times 10^{-4}$               | (8)     |
| $\kappa_L^c$               | Effective spring constant of line elements of the cell membrane [N/m]                               | $5.0 \times 10^{-5}$               | (10,11) |
| $\kappa_A^t$               | Effective spring constant of area elements of the transduce layer [N/m]                             | $1.0 \times 10^{-4}$               | C       |
| $\kappa_L^t$               | Effective spring constant of line elements of the transduce layer [N/m]                             | $5.0 \times 10^{-5}$               | C       |
| $\kappa_A^n$               | Effective spring constant of area elements of the nuclear membrane [N/m]                            | $1.0 \times 10^{-4}$               | (10,11) |
| $\kappa_L^n$               | Effective spring constant of line elements of the nuclear membrane [N/m]                            | $5.0 \times 10^{-3}$               | (18)    |
| $\kappa_{cort}$            | Effective spring constant of line element of the actin cortex [N/m]                                 | $8.0 \times 10^{-3}$               | C       |
| $\kappa_{f,s}^e$           | The stretching modulus of a fiber [nN]                                                              | 0.615 ~ 1.32                       | C       |
| $\kappa_{f,b}^e$           | The bending modulus of a fiber [pN $\mu m^2$ ]                                                      | $(3.02 \sim 12.81) \times 10^{-3}$ | C       |
| $\kappa_{SF}$              | Effective stiffness of the $i$ - $th$ single unit of SFs [N/m]                                      |                                    |         |
| $\kappa_{LR}$              | Spring constant of a single ligand-receptor bond [pN/nm]                                            | 1.0                                | (3)     |
| $k_{on}$                   | Kinetic association rate [s <sup>-1</sup> ]                                                         |                                    |         |
| $k_{on}^0$                 | Kinetic association rate at an unstressed state [ $molecule^{-1}s^{-1}$ ]                           | 1.0                                | C       |
| $k_{off}$                  | Kinetic dissociation rate [s <sup>-1</sup> ]                                                        |                                    |         |
| $k_{off}^0$                | Kinetic dissociation rate at an unstressed state [s <sup>-1</sup> ]                                 | 1.0                                | C       |
| $\theta_{ij}^e$            | Stressed angle at the $j$ - $th$ node between two segments in the $i$ - $th$ fiber                  |                                    |         |
| $\theta_{ij}^e0$           | Unstressed angle at the $j$ - $th$ node between two segments in the $i$ - $th$ fiber                |                                    |         |

|                     |                                                                     |    |     |
|---------------------|---------------------------------------------------------------------|----|-----|
| $\hat{t}_{i,k}$     | Tangential unit vector at the k-th segment in the $i - th$ fiber    |    |     |
| $t$                 | Time [s]                                                            |    |     |
| $\nu_m$             | Sliding rate of non-muscle myosin II on the actin filaments [nm/s]  |    |     |
| $\mathbf{x}$        | Location vector [ $\mu$ m]                                          |    |     |
| $\mathbf{x}_{L,i}$  | Root of ligand-rector bonds on the local surface of the fiber       |    |     |
| $\mathbf{x}_{ij}^e$ | The $j - th$ location vector along to the $i - th$ fiber [ $\mu$ m] |    |     |
| $\lambda$           | Equilibrium distance of an integrin [nm]                            | 30 | (4) |
| <b>Sup</b>          |                                                                     |    |     |
| $c$                 | cytoskeleton                                                        |    |     |
| $e$                 | extracellular matrix                                                |    |     |
| $n$                 | nucleus                                                             |    |     |
| $i$                 | $i - th$ node                                                       |    |     |
| $t$                 | transduce layer                                                     |    |     |
| $0$                 | Previous time or initial state                                      |    |     |
| $1$                 | Present time                                                        |    |     |
| <b>Sub</b>          |                                                                     |    |     |
| $E$                 | Elastic                                                             |    |     |
| $L$                 | Lamellipodium                                                       |    |     |
| $FA$                | Focal adhesion                                                      |    |     |
| $SF$                | Stress fiber                                                        |    |     |
| $T$                 | Transduce layer                                                     |    |     |
| $c$                 | cytoskeleton                                                        |    |     |
| $e$                 | extracellular matrix                                                |    |     |
| $n$                 | nucleus                                                             |    |     |
| $t$                 | transduce layer                                                     |    |     |
